# Supplementary material for: EFNA4 promotes cell proliferation and tumor metastasis in hepatocellular carcinoma through a PIK3R2/GSK3β/β-catenin positive feedback loop
Source: PubMed Central journal article supplement (PMC8397841; doi:10.1016/j.omtn.2021.06.002), 2021-06-12
Supplement: mmc1.pdf [file mmc1.pdf]

OMTN, Volume 25

## Supplemental information

**EFNA4 promotes cell proliferation and tumor  
metastasis in hepatocellular carcinoma through  
a PIK3R2/GSK3 $\beta$ / $\beta$ -catenin positive feedback loop**

**Junhao Lin, Chunting Zeng, JiaKang Zhang, Zhenghui Song, Na Qi, Xinhui Liu, Ziyang Zhang, Aimin Li, and Fengsheng Chen**

# Supplementary Material

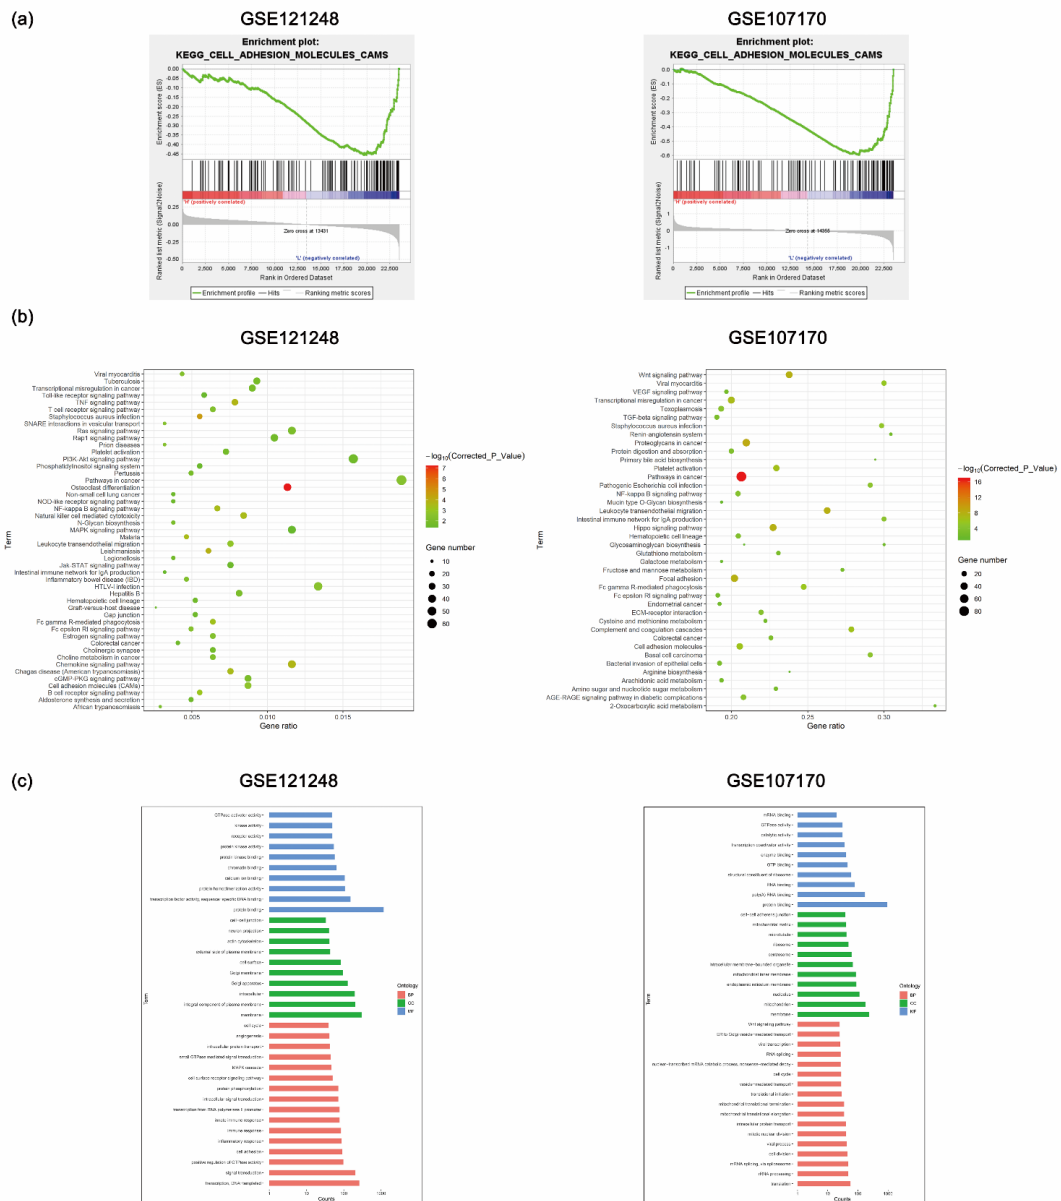

**Figure S1 (A)** GSEA analysis of GEO data sets (GSE121248 and GSE107170). **(B and C)** KEGG and GO enrichment of GEO data sets (GSE121248 and GSE107170). Abbreviations: GEO, Gene Expression Omnibus; GSEA, gene set enrichment analysis; KEGG, Kyoto Encyclopedia of Genes and Genomes

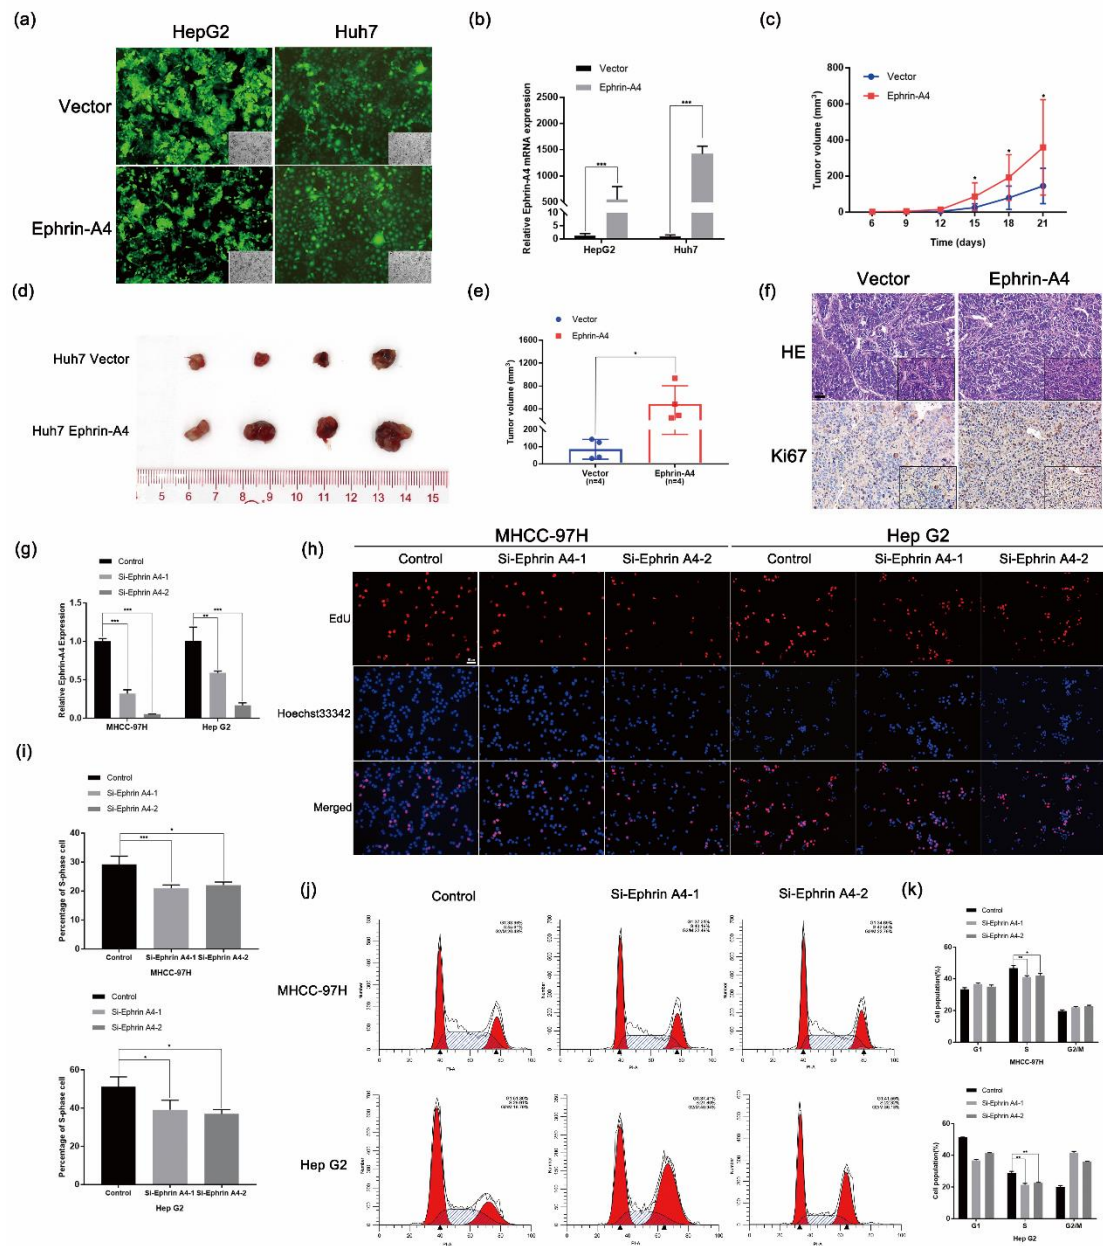

**Figure S2 (A)** Representative images of fluorescence and bright field of HepG2 and Huh7 cells with EFNA4-overexpressing lentivirus or empty vector lentivirus. **(B)** Expression of EFNA4 in EFNA4-overexpressing HepG2 and Huh7 cells, as detected by quantitative real-time PCR assays. \* $p < 0.05$ , \*\* $p < 0.01$ , \*\*\* $p < 0.001$ . **(C)** Tumor growth curve of the subcutaneous tumor model of HepG2 cells. **(D and E)** Representative images and quantitative data of the subcutaneous tumor model using

EFNA4-overexpressing Huh7 cells. **(F)** Representative images of HE staining and IHC staining of KI67, scale bar, 50  $\mu\text{m}$ . **(G)** Expression of EFNA4 in EFNA4-knockdown HepG2 and MHCC-97H cells, as detected by quantitative real-time PCR assays. **(H and I)** Representative images and quantitative data of EdU assay in HepG2 and MHCC-97H cells, scale bar, 50  $\mu\text{m}$ . **(J and K)** Representative images and quantitative data on flow cytometry assays.

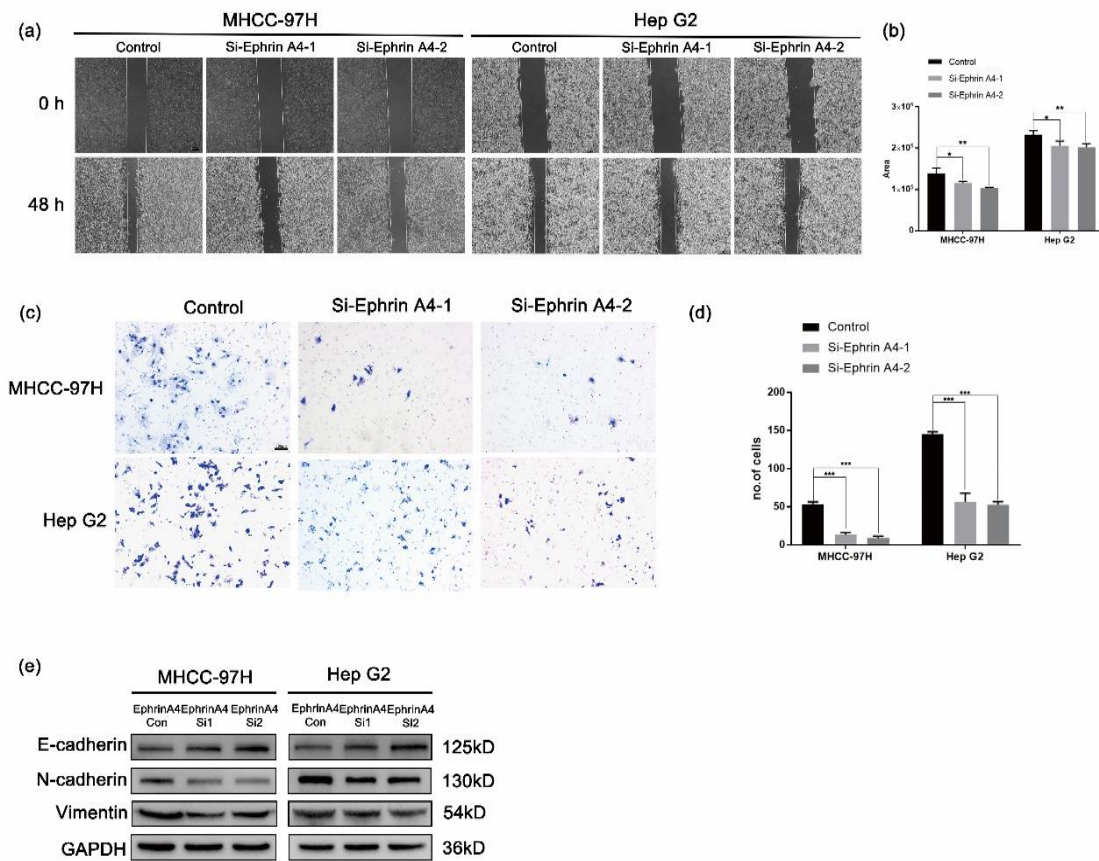

**Figure S3 (A and B)** Representative images and quantitative analysis of cell migration based on wound-healing assays using EFNA4-knockdown HepG2 and MHCC-97H cells, scale bar, 200  $\mu$ m. \* $p < 0.05$ , \*\* $p < 0.01$ , \*\*\* $p < 0.001$ . **(C and D)** Representative images and quantitative analysis of cell migration based on Transwell assays using EFNA4-knockdown HepG2 and MHCC-97H cells, scale bar, 100  $\mu$ m. **(E)** Analysis of EMT markers by western blotting in EFNA4-knockdown cell lysates.

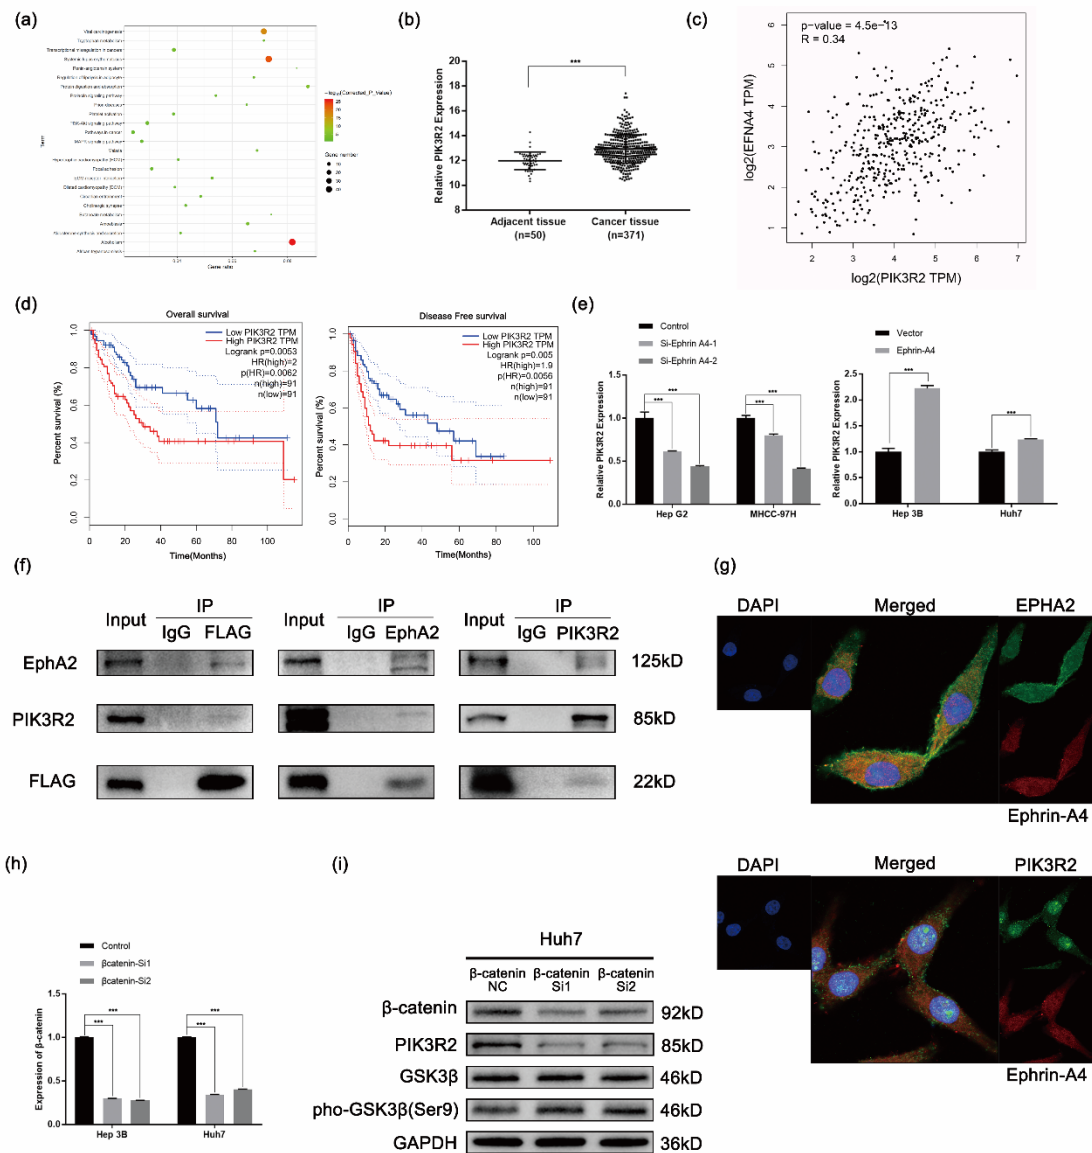

**Figure S4 (A)** KEGG enrichment of 164 altered genes ( $\geq 2$ -fold change,  $P < 0.05$ ) after knockdown of EFNA4 in MHCC-97H cells. **(B)** PIK3R2 was increased in HCC tissues of TCGA dataset (n=371) compared with adjacent tissues (n=50). \*\*\* $p < 0.001$ . **(C)** Pearson correlation coefficient analysis of EFNA4 and PIK3R2 in TCGA database. **(D)** Analysis of overall survival and disease-free survival among 182 patients with HCC. **(E)** Expression of PIK3R2 in EFNA4-knockdown and EFNA4-overexpressing HCC cells. **(F)** EFNA4-EPHA2-PIK3R2 interactions were analyzed

through Co-IP assay using Huh7 cell lysates, with an antibody against FLAG-EFNA4, EPHA2 or PIK3R2; interactions were revealed by western blotting. **(G)**

Immunofluorescence staining of EFNA4 and EPHA2 or PIK3R2 expression and localization in EFNA4-overexpressing Hep3B cell. **(H)** Expression of  $\beta$ -catenin in  $\beta$ -catenin-knockdown HCC cells. **(I)** Analysis of the levels of downstream molecules by western blotting using  $\beta$ -catenin-knockdown cell lysates in Huh7.

**Supplementary Table 1** Correlation between EFNA4 expression in tumor tissues

and clinicopathological characteristics of patients with liver cancer

| Variables         | Patients | Ephrin-A4 expression(%) |                 | P-value       |
|-------------------|----------|-------------------------|-----------------|---------------|
|                   | 90       | Low expression          | High expression |               |
| Gender            |          |                         |                 |               |
| Male              | 80       | 27(33.8)                | 53(66.2)        | >0.9999       |
| Female            | 10       | 3(30)                   | 7(70)           |               |
| Age               |          |                         |                 |               |
| < 60              | 68       | 23(33.8)                | 45(66.2)        | >0.9999       |
| ≥ 60              | 22       | 7(31.8)                 | 15(68.2)        |               |
| HbsAg             |          |                         |                 |               |
| Positive          | 70       | 22(31.4)                | 48(68.6)        | 0.4194        |
| Negative          | 19       | 8(42.1)                 | 11(57.9)        |               |
| HCVAb             |          |                         |                 |               |
| Positive          | 80       | 30(37.5)                | 50(62.5)        | 0.0903        |
| Negative          | 7        | 0                       | 7(100)          |               |
| TbIL              |          |                         |                 |               |
| ≥17.1             | 24       | 6(25)                   | 18(75)          | 0.3250        |
| <17.1             | 65       | 24(36.9)                | 41(63.1)        |               |
| ALT               |          |                         |                 |               |
| ≥100              | 7        | 3(42.9)                 | 4(57.1)         | 0.6839        |
| <100              | 82       | 27(32.9)                | 55(67.1)        |               |
| AFP               |          |                         |                 |               |
| ≥400              | 31       | 6(19.4)                 | 25(80.6)        | <b>0.0362</b> |
| <400              | 58       | 24(41.4)                | 34(58.6)        |               |
| Vascular invasion |          |                         |                 |               |
| Positive          | 21       | 3(14.3)                 | 18(85.7)        | <b>0.0319</b> |
| Negative          | 58       | 24(41.4)                | 34(58.6)        |               |
| Primary tumor (T) |          |                         |                 |               |
| T <sub>1</sub>    | 58       | 24(41.4)                | 34(58.6)        | 0.0893        |
| T <sub>2</sub>    | 28       | 5(17.9)                 | 23(82.1)        |               |
| T <sub>3</sub>    | 4        | 1(25)                   | 3(75)           |               |

A  $\chi^2$  test or Fisher's exact test was applied to access the associations between the expression of EFNA4 and the clinicopathologic characteristics of liver cancer patients.
